# Supplementary material for: Hereditary myotonia in cats associated with a new homozygous missense variant p.Ala331Pro in the muscle chloride channel ClC‐1
Source: PubMed Central journal article supplement — J Vet Intern Med. 2023 Sep 5;37(6):2498–503. doi: 10.1111/jvim.16837 (PMC10658498; doi:10.1111/jvim.16837), 2023-09-05
Supplement: JVIM-37-2498-s002.pdf [file JVIM-37-2498-s002.pdf]

**Supplementary Table 1.** Nucleotide sequences of primers used for specific gene amplification and for conventional PCR studies of *CLCN1* gene.

| Primer name                            | Primer sequence (5'-3')                                         | Exon    | T <sub>m</sub> (°C) | Amplicon length <sup>a</sup> |
|----------------------------------------|-----------------------------------------------------------------|---------|---------------------|------------------------------|
| Gandolfi <sup>b</sup> _CLCN1_Ex_1      | F: TCATGTGACGGAGAGATGGCTATA<br>R: TACAACACTTCTCCCGCTTTCAC       | 1       | 58                  | 428                          |
| Gandolfi <sup>b</sup> _CLCN1_Ex_2-5    | F: GACCACCACAAAGTGACCCTACAT<br>R: ACTTCTGTTATTCTGCTCCAGGACTAG   | 2-5**   | 58                  | 2,007                        |
| ASB <sup>c</sup> _CLCN1_E6             | F: CTCAGTGCCTGAAGCCATAAA<br>R: CGCGGTGTGTGTGTAGAATAA            | 6       | 58                  | 311                          |
| Gandolfi <sup>b</sup> _CLCN1_Ex_7      | F: AAGCCTCTCTTCTGCCTTATTCC<br>R: CGGTAAATGCTCACTAAAAGTTTGC      | 7       | 58                  | 309                          |
| Gandolfi <sup>b</sup> _CLCN1_Ex_8-12   | F: AGCAGGTGTATGTTTTAGAGCGTGA<br>R: TGAATAGACACTGGCTCACTCCTATAGA | 8-9**   | 58                  | 2,319                        |
| ASB <sup>c</sup> _CLCN1_E10            | F: CTCGGAGGAAGGAAGGAATTG<br>R: CACACCGTGTTCTCTCTCTATG           | 10      | 58                  | 641                          |
| ASB <sup>c</sup> _CLCN1_E11/12         | F: TCCTCTCCCTCACTCACTTT<br>R: CGCTATGGTTTCCAGCTACTT             | 11-12   | 58                  | 970                          |
| Gandolfi <sup>b</sup> _CLCN1_Ex_13-14  | F: ATGTGTATTGGGCAGGGTTGAG<br>R: ATGGGAGAGTTTGAGTGTGGCTAT        | 13-14   | 58                  | 477                          |
| Gandolfi <sup>b</sup> _CLCN1_Ex_15-16  | F: TGTCTCCCCATTCTATGCTACTCC<br>R: CTAATGACAAGCCCACACTACAGT      | 15-16   | 58                  | 757                          |
| Gandolfi <sup>b</sup> _CLCN1_Ex_17-20* | F: AGTGCTGAATGAGTGAATAAAAAGGG<br>R: GCCTGGACTCGCATCTTACTCTTA    | 17-20** | 59                  | 1,605                        |
| Gandolfi <sup>b</sup> _CLCN1_Ex_21-23  | F: GCGTATTTCAAGGTCTGGGCT<br>R: GTGAGAAACAGAGTGGGAAGTC           | 21-22   | 58                  | 508                          |
| ASB <sup>c</sup> _CLCN1_E21/22         | F: CATCTTCGTCCTCTTCCCAAC<br>R: GTACCCTCTCCCACACAAAG             | 23      | 58                  | 494                          |

<sup>a</sup>Base pairs. <sup>b</sup>Primers previously described<sup>14</sup>. <sup>c</sup>Primers designed in the present study. \*Add 1.5 µL of dimethyl sulfoxide (DMSO). \*\* Exons that were sequenced with primers (5'-3') different from the primers used in the PCR reaction (exon 4: For - GAGAACAATACCGTGTGGTGAGG; exon 5: For - CTGGAAGCGGCACATAATCACT; exon 8 and 9: Rev - CCAGCAACTCACTCACCCAC; exon 17: For - GTCCTGGCAGATGTTTGAATG and Rev - CCATCACCTGCAACCTTATCT; exon 18: For - AGAGATTTCCAGGACACCAGC; exon 19: Rev - TCAGTTCGCAGAGGCACGC; exon 20: For - ATGACTAGGAAGGCAAGCATC and Rev - AGGGAACAGTGTCTCCATTG).

**Supplementary Table 2. cDNA Primers for PCR\***

| Primer name   | Primer sequence (5'-3')                                |
|---------------|--------------------------------------------------------|
| ASB_cDNA_set1 | F: ATGGAGCGGTCAGAGTCC<br>R: TCCAGCTAACCAGAGCCATAA      |
| ASB_cDNA_set2 | F: ACAGCAAGGATGAGGATCAC<br>R: ACAGTCAGCATGTCAGTGTAATA  |
| ASB_cDNA_set3 | F: CTTTGTGGCCAAGGTTGTG<br>R: CAGCTCTCCAGCCATGAAT       |
| ASB_cDNA_set4 | F: CCTCAGCAAGTTCATGTCAATG<br>R: GAAGAGGAGGATGATGATGACG |
| ASB_cDNA_set5 | F: CATGCTATTCCTGACGGTATC<br>R: CCTCTTCATCCTCATCCACAAA  |
| ASB_cDNA_set6 | F: CTGTCTGAGCTGCCTTATGAT<br>R: CTGGTCACGTAAGCAAGGT     |
| ASB_cDNA_set7 | F: CACCATGTCACCTGAAGAGATT<br>R: ATCAGTTCGTCCTCGTCCT    |

\*The PCR (20  $\mu$ l) contained 2  $\mu$ L of cDNA, 10  $\mu$ L of GoTaq Green PCR Master Mix (Promega, Madison, WI), 0.5 M of each primer, and 6  $\mu$ L of nuclease-free water.
